## RESEARCH ARTICLE

## Interhospital variation in the nonoperative management of acute cholecystitis

Konmal Ali<sup>1</sup>, Nikhil L. Chervu<sup>2</sup>, Sara Sakowitz<sup>1</sup>, Syed Shahyan Bakhtiyar<sup>3</sup>, Peyman Benharash<sup>1,2\*</sup>, Shahin Mohseni<sup>4</sup>, Jessica A. Keeley<sup>5</sup>

**1** David Geffen School of Medicine, University of California, Los Angeles, Los Angeles, CA, United States of America, **2** Department of Surgery, David Geffen School of Medicine, University of California, Los Angeles, Los Angeles, CA, United States of America, **3** Department of Surgery, University of Colorado, Aurora, CO, United States of America, **4** Division of Trauma and Emergency Surgery, Department of Surgery, Örebro University Hospital, Örebro, Sweden, **5** Division of Trauma and Critical Care, Department of Surgery, Harbor-UCLA Medical Center, Los Angeles, CA, United States of America

\* [pbenharash@mednet.ucla.edu](mailto:pbenharash@mednet.ucla.edu)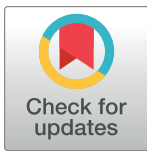

## OPEN ACCESS

**Citation:** Ali K, Chervu NL, Sakowitz S, Bakhtiyar SS, Benharash P, Mohseni S, et al. (2024) Interhospital variation in the nonoperative management of acute cholecystitis. PLoS ONE 19(6): e0300851. <https://doi.org/10.1371/journal.pone.0300851>

**Editor:** Barry Kweh, National Trauma Research Institute, AUSTRALIA

**Received:** January 4, 2024

**Accepted:** March 5, 2024

**Published:** June 10, 2024

**Peer Review History:** PLOS recognizes the benefits of transparency in the peer review process; therefore, we enable the publication of all of the content of peer review and author responses alongside final, published articles. The editorial history of this article is available here: <https://doi.org/10.1371/journal.pone.0300851>

**Copyright:** © 2024 Ali et al. This is an open access article distributed under the terms of the [Creative Commons Attribution License](https://creativecommons.org/licenses/by/4.0/), which permits unrestricted use, distribution, and reproduction in any medium, provided the original author and source are credited.

**Data Availability Statement:** Data can be accessed at the Agency for Healthcare Research and Quality (<https://www.hcup-us.ahrq.gov/>) upon completion of Data Use Agreement for researchers who meet

## Abstract

## Background

Cholecystectomy remains the standard management for acute cholecystitis. Given that rates of nonoperative management have increased, we hypothesize the existence of significant hospital-level variability in operative rates. Thus, we characterized patients who were managed nonoperatively at normal and lower operative hospitals (>90th percentile).

## Methods

All adult admissions for acute cholecystitis were queried using the 2016–2019 Nationwide Readmissions Database. Centers were ranked by nonoperative rate using multi-level, mixed effects modeling. Hospitals in the top decile of nonoperative rate (>9.4%) were classified as Low Operative Hospitals (LOH; others:nLOH). Separate regression models were created to determine factors associated with nonoperative management at LOH and nLOH.

## Results

Of an estimated 418,545 patients, 9.9% were managed at 880 LOH. Multilevel modeling demonstrated that 20.6% of the variability was due to hospital factors alone. After adjustment, older age (Adjusted Odds Ratio [AOR] 1.02/year, 95% Confidence Interval [CI] 1.01–1.02) and public insurance (Medicare AOR 1.31, CI 1.21–1.43 and Medicaid AOR 1.43, CI 1.31–1.57; reference: Private Insurance) were associated with nonoperative management at LOH. These were similar at nLOH. At LOH, SNH status (AOR 1.17, CI 1.07–1.28) and small institution size (AOR 1.20, CI 1.09–1.34) were associated with increased odds of nonoperative management.

## Conclusion

We noted a significant variability in the interhospital variation of the nonoperative management of acute cholecystitis. Nevertheless, comparable clinical and socioeconomic factors

the criteria for access to confidential data. Data cannot be provided directly by the authors due to specific approval required by the Agency for Healthcare Research and Quality. The authors had no special access privileges to the data others would not have.

**Funding:** The author(s) received no specific funding for this work.

**Competing interests:** P. Benharash serves as a proctor for AtriCure. The content of this manuscript is unrelated to this work. The others authors have no disclosures. All authors declare no competing interests.

contribute to nonoperative management at both LOH and non-LOH. Directed strategies to address persistent non-clinical disparities are necessary to minimize deviation from standard protocol and ensure equitable care.

## Introduction

With a national annual incidence of 120,000, acute cholecystitis is responsible for an estimated \$6.3 billion in healthcare expenditures [1, 2]. While cholecystectomy is the mainstay of treatment, rates of nonoperative management have increased over the last 40 years [3, 4]. Nonoperative therapies include antibiotics alone and image-guided procedures such as percutaneous gallbladder aspiration or drainage [5, 6]. Patient factors associated with non-operative management have been identified to include older age and public insurance [7, 8].

A growing body of literature has reported clinical success after nonoperative management of splenic injuries, appendicitis, and diverticulitis [9–11]. The decision to nonoperatively manage a patient is often due to comorbidity and age. However, resource availability and surgeon expertise may also influence the likelihood of nonoperative management [12]. Previous work in other surgical fields has suggested that tertiary hospital status is associated with higher rates of nonoperative treatment for low-risk thyroid cancers, small kidney masses, and splenic injuries [9, 10]. Although nonoperative management has proved efficacious in several disease categories, its utility in the case of acute cholecystitis has been debated with some reporting worse outcomes and increased complexity of eventual surgery [13]. Despite this, large-scale studies examining the center-level variation in the nonoperative management of acute cholecystitis are lacking.

In the present study, we used a nationally representative database to determine the presence of interhospital variation in the nonoperative management of acute cholecystitis. Furthermore, we compared the patient and hospital characteristics of nonoperatively managed individuals at lower operative hospitals to others. We hypothesized the presence of significant variability in operative rates attributable to hospital factors alone. Finally, while we predict advanced age and increased comorbid disease to reduce the likelihood of surgical management, socioeconomic and demographic factors may contribute to further disparities.

## Methods

### Data source and study population

We queried the 2016–2020 Nationwide Readmissions Database (NRD) for all adult ( $\geq 18$  years of age) admissions with a primary diagnosis of acute cholecystitis using *International Classification of Diseases codes, Tenth Revision* (ICD-10) codes. Maintained by the Healthcare Cost and Utilization Project, NRD is the largest all-payer readmissions database. Precise hospital discharge weights are used to account for 17 million annual discharges out of 36 million hospitalizations per year, accurately estimating 60% of all hospitalizations in the US from 28 states [14]. Patients with missing data for age, sex, or costs and those who underwent percutaneous cholecystectomy or were treated at hospitals with zero operative volume were excluded (3.6%; Fig 1).

### Variable definitions

Patient and hospital characteristics including age, sex, income quartile, primary payer, hospital setting, hospital teaching status, and bed size were defined according to the NRD data

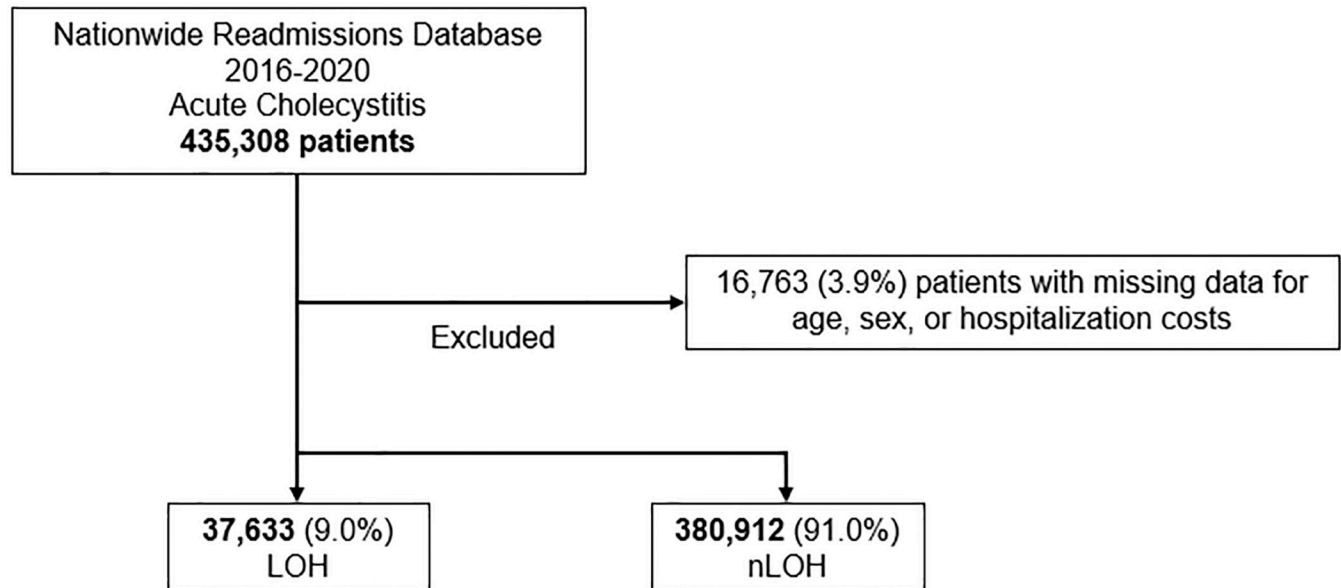

**Fig 1. Exclusion criteria; LOH, Low Operative Hospitals; nLOH, non-Low Operative Hospitals.**

<https://doi.org/10.1371/journal.pone.0300851.g001>

dictionary. The van Walraven modification of the Elixhauser Comorbidity Index was used to incorporate the burden of chronic conditions into our analysis [15]. Additional patient comorbidities and complications were defined using ICD-10 codes. Patient comorbidities, complications, and additional procedures were determined using ICD 10 codes. The 2019 Personal Health Index was used to compute hospital prices, which were then adjusted for inflation using hospital-specific cost-to-charge ratios [16].

### Statistical analysis and study outcomes

We used multi-level, mixed-effects logistic regression modeling to rank hospitals by risk-adjusted nonoperative rates. Patient characteristics (age, sex, payer status, income level, and comorbid conditions) comprised the first level. Unique identifiers were used to treat hospitals as the second level. The “estat icc” command in Stata was then used to calculate the intraclass correlation coefficient (ICC). The ICC represents the proportion of total observed variation in the outcome due to interhospital differences. We subsequently generated baseline nonoperative rates at each center by estimating random intercepts via previously reported Bayesian methodology [17]. Hospitals with nonoperative rates  $\geq 90^{\text{th}}$  percentile corresponding to a non-operative rate of 9.4% were classified as *Low Operative Hospitals* (LOH) with the rest classified as nLOH. Additionally, hospitals in the top quartile of Medicaid or self-pay (uninsured) admissions as defined by the Agency for Healthcare Research and Quality (AHRQ) were classified as safety net hospitals (SNHs).

Our primary outcome of interest was to determine if there was significant interhospital variation in the nonoperative management of acute cholecystitis independent of clinical and patient factors. We secondarily assessed patient, clinical, and hospital factors associated with nonoperative management at LOH and nLOH.

Continuous data are reported as means with standard deviation (SD) or medians with interquartile ranges (IQR) and categorical data as group proportions (%). The adjusted Wald and Pearson  $\chi^2$  tests were used to determine the significance of intergroup differences amongst continuous and categorical variables, respectively. Relevant patient and hospital factors were selected for inclusion in regression models by Least Absolute Shrinkage Selection Operator

(LASSO) [18]. This regularization method improves out-of-sample model reliability and accuracy while reducing intervariable collinearity. Subsequently, two separate multivariable regression models were developed to determine factors associated with non-operative management at LOH and nLOH. Subgroup analysis was performed among the geriatric population (<65 years) to determine which factors were associated with nonoperative intervention after adjustment in this population. All models were adjusted for patient age, sex, and Elixhauser Comorbidity Index. Receiver operating characteristics (C-statistic) were used to optimize models in addition to Akaike and Bayesian information [19]. Regression outputs are presented as adjusted odds ratios (AOR) or beta-coefficients ( $\beta$ ) with 95% confidence intervals (CI). An  $\alpha$  less than 0.05 was set for significance.

Stata 16.1 was used for all analyses (StataCorp, College Station, TX). This study was deemed exempt from full review by the Institutional Review Board at the University of California, Los Angeles.

## Results

### Characteristics of operative and nonoperative patients

Of an estimated 418,545 patients who met study criteria, 83,272 (19.9%) were managed nonoperatively. Compared to operative patients, nonoperative patients were older (64.5 years  $\pm$  19.3 vs 54.6  $\pm$  19.1), less commonly female (49.2 vs 58.3%), and had a higher burden of comorbid disease by Elixhauser Index (2 [3–5] vs 2 [1–3], all  $p < 0.001$ ). Nonoperative patients were more commonly in the lowest income quartile (29.3 vs 28.2%), and more likely to have Medicare (57.6 vs 37.0%), as opposed to private insurance (20.0 vs 34.5%, all  $p < 0.001$ ), compared to others. Patients managed nonoperatively were more frequently treated at SNH (26.2 vs 24.9,  $p = 0.010$ ) and at metropolitan teaching institutions (70.9 vs 65.3%,  $p < 0.001$ ; [Table 1](#)).

### Interhospital variation in nonoperative management

A multivariable mixed-effects model was used to assess the impact of individual hospitals on variations in nonoperative management for acute cholecystitis. We found that 20.6% of nonoperative variation was attributable to interhospital differences by calculation of the ICC. Observed-to-expected ratios for each hospital were subsequently calculated with centers having a nonoperative rate  $> 9.2\%$  classified as LOH ([Fig 2](#)).

### Characteristics of patients at Low Operative Hospitals

37,633 patients (9.9% of the entire cohort) were managed at 880 LOH. Compared to patients at nLOH, patients at LOH were similar in age (56.2 years  $\pm$  20.0 vs 56.6  $\pm$  19.5,  $p = 0.13$ ) and proportion female (56.0 vs 56.6%,  $p = 0.24$ ). LOH patients were comparable in regards to income quartile distribution, but were less likely to have private insurance (30.1 vs 31.7%,  $p < 0.001$ ), compared to others. Regarding hospital characteristics, a higher proportion of LOH were designated as SNH (40.6 vs 27.4%) and they were more frequently metropolitan teaching institutions (56.4 vs 42.9%, both  $p < 0.001$ ), compared to nLOH. No difference in hospital size was noted between LOH and nLOH ([Table 2](#)).

After adjustment, increasing age (AOR 1.02/year, 95% CI 1.02–1.02), Medicare (AOR 1.31, 95% CI 1.21–1.43, ref: Private), Medicaid (AOR 1.43, 95% CI 1.31–1.57, ref: Private), and uninsured status (AOR 1.34, 95% CI 1.11–1.61, ref: Private) were among the factors associated with increased odds of nonoperative management at LOH (C-statistic: 0.68). Hospital factors such as SNH status (AOR 1.17, 95% CI 1.07–1.28) and small size (AOR 1.20, 95% CI 1.09–1.34, ref: Large) were also associated with higher odds of nonoperative management at LOH.

**Table 1. Baseline patient and hospital demographics of nonoperatively and operatively managed patients admitted for acute cholecystitis 2016–2019.**

|                                 | Nonoperative (n = 83,272) | Operative (n = 335,273) | p-value |
|---------------------------------|---------------------------|-------------------------|---------|
| <b>Patient Characteristics</b>  |                           |                         |         |
| Age (years, mean ± SD)          | 64.5 ± 19.3               | 54.6 ± 19.1             | <0.001  |
| Female (%)                      | 40,961 (49.2)             | 195,553 (58.3)          | <0.001  |
| Income percentile (%)           |                           |                         | <0.001  |
| 0–25th                          | 24,112 (29.3)             | 93,523 (28.2)           |         |
| 26th–50th                       | 22,605 (27.5)             | 93,092 (28.1)           |         |
| 51st–75th                       | 19,456 (23.7)             | 82,525 (24.9)           |         |
| 76th–100th                      | 16,024 (19.5)             | 61,985 (18.7)           |         |
| Payer (%)                       |                           |                         | <0.001  |
| Private                         | 16,611 (20.0)             | 115,256 (34.5)          |         |
| Medicare                        | 47,855 (57.6)             | 123,794 (37.0)          |         |
| Medicaid                        | 12,737 (15.3)             | 61,433 (18.4)           |         |
| Uninsured                       | 3,577 (4.3)               | 21,044 (6.3)            |         |
| Other payer                     | 2,351 (2.8)               | 13,074 (3.9)            |         |
| Elixhauser index (median, IQR)  | 2 [3–5]                   | 2 [1–3]                 | <0.001  |
| <b>Comorbidities (%)</b>        |                           |                         |         |
| Cancer (metastatic)             | 2,827 (3.4)               | 2,048 (0.6)             | <0.001  |
| Cancer (non-metastatic)         | 5,254 (6.3)               | 4,895 (1.5)             | <0.001  |
| Cardiac arrhythmia              | 21,050 (25.3)             | 43,996 (13.1)           | <0.001  |
| Congestive heart failure        | 13,823 (16.6)             | 18,249 (5.4)            | <0.001  |
| Chronic lung disease            | 16,028 (19.2)             | 47,064 (14.0)           | <0.001  |
| Chronic liver disease           | 10,246 (12.3)             | 33,669 (10.0)           | <0.001  |
| Coagulopathy                    | 6,849 (8.2)               | 11,979 (3.6)            | <0.001  |
| Diabetes                        | 23,967 (28.8)             | 66,949 (20.0)           | <0.001  |
| End-stage renal disease         | 15,209 (18.3)             | 28,769 (8.2)            | <0.001  |
| Hypertension                    | 52,966 (63.6)             | 162,478 (48.5)          | <0.001  |
| Neurological disorder           | 5,957 (7.2)               | 12,311 (3.7)            | <0.001  |
| Obesity                         | 15,745 (18.9)             | 86,558 (25.8)           | <0.001  |
| Pulmonary circulatory disorder  | 3,760 (4.5)               | 5,304 (1.6)             | <0.001  |
| Peripheral vascular disease     | 7,380 (8.9)               | 13,112 (3.9)            | <0.001  |
| Rheumatologic disorder          | 2,365 (2.8)               | 7,291 (2.2)             | <0.001  |
| <b>Hospital Characteristics</b> |                           |                         |         |
| Hospital status (%)             |                           |                         | <0.001  |
| Non-metropolitan                | 6,836 (8.2)               | 27,842 (8.2)            |         |
| Metropolitan non-teaching       | 17,430 (20.9)             | 88,691 (26.5)           |         |
| Metropolitan teaching           | 59,006 (70.9)             | 219,100 (65.3)          |         |
| Bed Size (%)                    |                           |                         | 0.73    |
| Large                           | 43,594 (52.4)             | 176,828 (52.7)          |         |
| Medium                          | 24,176 (29.0)             | 96,623 (28.8)           |         |
| Small                           | 15,503 (18.6)             | 61,822 (18.4)           |         |
| Safety net hospital status (%)  | 21,816 (26.2)             | 83,520 (24.9)           | 0.010   |

SD, standard deviation; IQR, interquartile range

<https://doi.org/10.1371/journal.pone.0300851.t001>

Female sex (AOR 0.72, 95% CI 0.68–0.77, ref: male) and treatment at a metropolitan non-teaching (AOR 0.73, 95% CI 0.64–0.84, ref: non-metropolitan) or teaching institution (AOR 0.64, 95% CI 0.57–0.72, ref: non-metropolitan) were conversely associated with lower adjusted odds of nonoperative management (Fig 3).

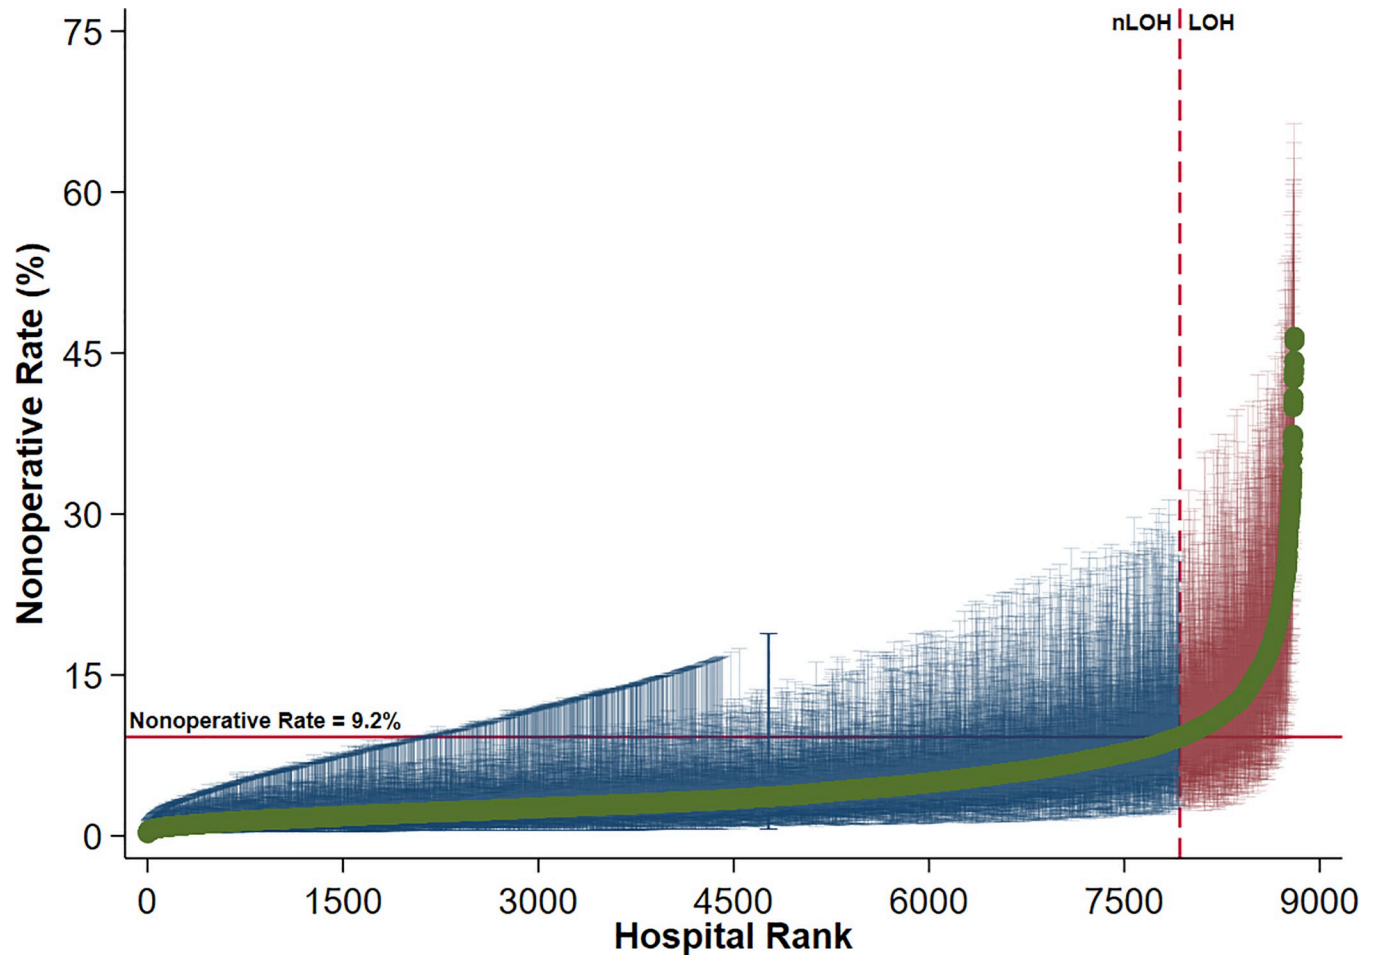

**Fig 2. Interhospital variation in nonoperative management of acute cholecystitis with 95% confidence intervals.** Centers in the top decile of nonoperative rate (>9.4%) were classified as Low Operative Hospitals; LOH, Low Operative Hospitals; nLOH, non-Low Operative Hospitals.

<https://doi.org/10.1371/journal.pone.0300851.g002>

Multivariable analysis of nonoperative management at nLOH (C-Statistic: 0.72) demonstrated similar increased adjusted odds of nonoperative management associated with increasing age (AOR 1.02/year, 95% CI 1.02–1.03), Medicare (AOR 1.22, 95% CI 1.17–1.27, ref: Private), Medicaid (AOR 1.60, 95% CI 1.53–1.68, ref: Private), and uninsured status (AOR 1.53, 95% CI 1.43–1.64, ref: Private). Female sex (AOR 0.82, 95% CI 0.80–0.84, ref: male) remained associated with reduced adjusted odds of nonoperative management at nLOH. Importantly, nLOH patients treated at metropolitan teaching hospitals demonstrated increased adjusted odds of nonoperative management (AOR 1.25, 95% CI 1.18–1.34, ref: non-metropolitan). No association between hospital bed size or SNH status and adjusted odds of nonoperative management was observed at nLOH (Fig 3).

## Discussion

Although a growing number of general surgical diagnoses such as for appendicitis or diverticulitis are being managed without surgical intervention, objective criteria for nonoperative management is often sparse [9, 10]. In the present study, nearly 20% of patients underwent nonoperative management for acute cholecystitis. Likely due to the lack of standardized criteria, we noted the presence of significant interhospital variation. We found that LOH were



**Table 2. Baseline patient and hospital demographics of patients admitted for acute cholecystitis 2016–2019 receiving treatment at Low Operative Hospitals (LOH) versus non-Low Operative Hospitals (nLOH).**

|                                 | LOH (n = 37,633) | nLOH (n = 380,912) | p-value |
|---------------------------------|------------------|--------------------|---------|
| <b>Patient Characteristics</b>  |                  |                    |         |
| Age (years, mean ± SD)          | 56.2 ± 20.0      | 56.6 ± 19.5        | 0.13    |
| Female (%)                      | 21,073 (56.0)    | 215,441 (56.6)     | 0.24    |
| <i>Income percentile (%)</i>    |                  |                    |         |
| 0-25th percentile               | 11,487 (30.8)    | 106,148 (28.2)     | 0.061   |
| 26th-50th percentile            | 10,139 (27.2)    | 105,557 (28.1)     |         |
| 51st-75th percentile            | 8,443 (22.6)     | 93,567 (24.9)      |         |
| 76th-100th percentile           | 7,228 (19.4)     | 70,781 (18.8)      |         |
| <i>Payer (%)</i>                |                  |                    |         |
| Private                         | 11,306 (30.1)    | 120,731 (31.7)     | <0.001  |
| Medicare                        | 14,789 (39.4)    | 156,861 (41.2)     |         |
| Medicaid                        | 8,584 (22.8)     | 65,586 (17.2)      |         |
| Other payer                     | 1,178 (3.1)      | 14,247 (3.7)       |         |
| Uninsured                       | 1,720 (4.6)      | 22,901 (6.0)       |         |
| Elixhauser index (median, IQR)  | 2 [1–4]          | 2 [1–4]            | <0.001  |
| <i>Comorbidities (%)</i>        |                  |                    |         |
| Neurological disorder           | 1,523 (4.0)      | 16,745 (4.4)       | 0.029   |
| Cancer (metastatic)             | 528 (1.4)        | 4,347 (1.1)        | 0.027   |
| Cancer (non-metastatic)         | 1,097 (2.9)      | 9,052 (2.4)        | 0.002   |
| Cardiac arrhythmia              | 5,358 (14.2)     | 59,689 (15.7)      | <0.001  |
| Congestive heart failure        | 2,670 (7.1)      | 29,401 (7.7)       | 0.028   |
| Chronic lung disease            | 5,568 (14.8)     | 57,523 (15.1)      | 0.37    |
| Chronic liver disease           | 3,365 (8.9)      | 40,549 (10.6)      | <0.001  |
| Coagulopathy                    | 1,566 (4.2)      | 17,262 (4.5)       | 0.054   |
| Diabetes                        | 8,241 (21.9)     | 82,675 (21.8)      | 0.63    |
| End-stage renal disease         | 3,503 (9.3)      | 39,332 (10.3)      | 0.01    |
| Hypertension                    | 18,712 (49.7)    | 196,731 (51.6)     | 0.005   |
| Obesity                         | 8,650 (23.0)     | 93,653 (24.6)      | 0.004   |
| Peripheral vascular disease     | 1,774 (4.7)      | 18,717 (4.9)       | 0.40    |
| Pulmonary circulatory disorder  | 728 (1.9)        | 8,337 (2.2)        | 0.032   |
| Rheumatologic disorder          | 777 (2.1)        | 8,879 (2.3)        | 0.029   |
| <b>Hospital Characteristics</b> |                  |                    |         |
| <b>n = 880</b>                  |                  | <b>n = 7,927</b>   |         |
| <i>Hospital status (%)</i>      |                  |                    |         |
| Non-metropolitan                | 186 (21.1)       | 1,924 (24.3)       | <0.001  |
| Metropolitan non-teaching       | 198 (22.5)       | 2,601 (32.8)       |         |
| Metropolitan teaching           | 496 (56.4)       | 3,402 (42.9)       |         |
| <i>Bed Size (%)</i>             |                  |                    |         |
| Large                           | 302 (34.3)       | 2,779 (35.1)       | 0.001   |
| Medium                          | 281 (31.9)       | 2,486 (31.5)       |         |
| Small                           | 297 (33.8)       | 2,652 (33.5)       |         |
| Safety net hospital status (%)  | 357 (40.6)       | 2,169 (27.4)       | <0.001  |

SD, standard deviation; IQR, interquartile range

<https://doi.org/10.1371/journal.pone.0300851.t002>

more commonly metropolitan teaching institutions and had a higher proportion of patients with non-private insurance. Despite these differences, factors such as increasing age, non-private insurance, and other socioeconomic characteristics were equally associated with adjusted

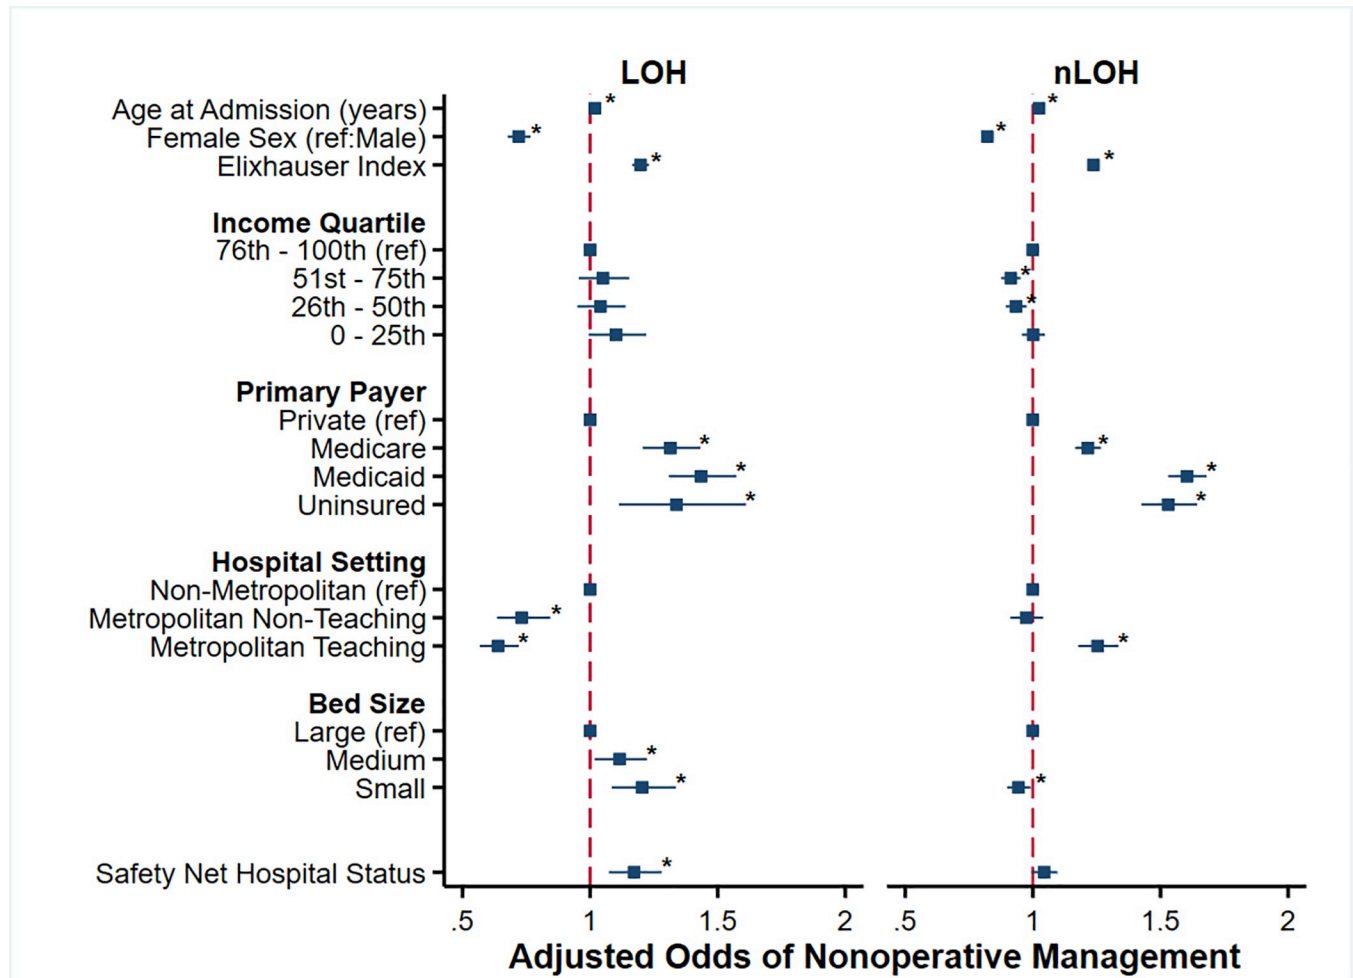

**Fig 3.** Factors associated with adjusted odds of nonoperative management for acute cholecystitis at Low Operative Hospitals (LOH; left) and non-Low Operative Hospitals (nLOH, right).

<https://doi.org/10.1371/journal.pone.0300851.g003>

odds of nonoperative management at both LOH and nLOH. These disparities in operative management warrant further discussion.

Emphasis on value-based quality metrics has identified interhospital variation as a contemporary method to identify deviations from the standard of care [20]. Traditional measures, such as mortality and overall readmission rates, have been questioned due to inherent differences in patient populations, disease severity, comorbid conditions, and other socioeconomic factors [21, 22]. Accordingly, patient independent variation may indicate true quality differences between hospitals. After controlling for patient factors, we found that there was significant variation in the rate of nonoperative management for acute cholecystitis. Varying care practices can increase risk for inequitable application of nonoperative management and can result in increased overall complications. Particularly challenging cases notwithstanding, cholecystectomy is not usually resource-intensive or associated with significant morbidity [23, 24]. Prior studies have demonstrated that nonoperative management in poor surgical candidates is associated with a high rate of repeat admissions for recurrent cholecystitis [2]. Lack of symptom relief has been shown to result in > 30% readmission rates and the eventual need for cholecystectomy [2, 13, 25]. In addition, nonoperative management may worsen quality of life



as it often requires readmission or surgical intervention. A 2014 prospective randomized study found that patients undergoing delayed cholecystectomy had significantly lower patient satisfaction scores, compared to others [26]. Both persistent pain and need for readmission were primary factors in these lower scores. Given the variation in nonoperative rates attributable to hospital variation, communities may be subject to non-standard care based on nonoperative rates, suggesting that specific communities may be subject to non-standard care based on location, insurance status, and income.

LOH demonstrated significant differences in patient and hospital characteristics, relative to nLOH. Specifically, LOH cared for a greater proportion of patients with public insurance. Government-funded insurance and uninsured status have been associated with lower operative rates and overall inferior outcomes in the surgical oncology and orthopedic literature [27–29]. However, prior literature has reported conflicting findings regarding the association of insurance coverage with nonoperative management of emergency general surgical conditions [30–32]. In a study of ~140,000 patients presenting with acute cholecystitis, Loehrer et al found that expanded insurance coverage as part of healthcare reform was associated with increased rates of immediate cholecystectomy among self-pay or government-insured patients [32]. Yet, in another study, McCutcheon et al. reported no difference in rates of operative treatment among insured and uninsured patients [31]. Notably, LOH were also more often safety net hospitals. These hospitals play an essential role in caring for the underserved, but they may also face challenges in funding and staffing [33, 34]. While information assessing surgical team was unavailable for this analysis, future studies should investigate potential associations between surgeon specialty or expertise and non-operative management decisions.

Regardless of LOH status, increasing age and non-private insurance were associated with increased odds of nonoperative management in both cohorts. Prior studies have shown public insurance to be linked with nonoperative management. A 2021 study by Hashmi et al demonstrated that while privately insured patients made up 38.7% of operative EGS cases, they only made up 28.5% of overall admissions, signifying increased likelihood of surgical management compared to insured patients [35]. Similar decreases were found at the best-performing and worst-performing hospitals further indicating that patient insurance status is independently associated with nonoperative management. Although non-private insurance has been associated with increased disease complexity in EGS, this alone may not explain such differences [36]. Indeed, decreased access and fears regarding the ability to pay for surgical care have been cited as reasons for reduced operations in non-privately insured patients [37, 38]. Institutional and systems-based research examining patient and physician factors contributing to nonoperative cholecystitis management is necessary to address potential bias.

## Limitations

Our study has several limitations due to the use of an administrative database. The NRD does not possess granular data such as lab values or notation regarding specific physician or patient decision-making that may influence operative or nonoperative management. In addition, our study is reliant on accurate ICD coding, which is primarily used for reimbursements as opposed to future quality research. As a retrospective study, causal relationships cannot be made.

## Conclusion

In this nationwide retrospective study, we found significant interhospital variation in the operative rates for acute cholecystitis. We found that LOH were more likely to be metropolitan teaching hospitals with a higher proportion of non-privately insured patients. Regardless, we

found that older patients and non-privately insured patients were associated with higher adjusted odds of nonoperative management at both LOH and nLOH. Although improved antibiotics and new therapeutic modalities may augment nonoperative management, our observed variation likely points to insurance-based disparities. Future work should examine the factors affecting the choice to pursue nonoperative management at a more granular level to expose systemic biases.

## Author Contributions

**Conceptualization:** Konmal Ali, Nikhil L. Chervu, Syed Shahyan Bakhtiyar, Peyman Benharash, Shahin Mohseni, Jessica A. Keeley.

**Data curation:** Konmal Ali, Nikhil L. Chervu, Syed Shahyan Bakhtiyar, Jessica A. Keeley.

**Formal analysis:** Konmal Ali, Nikhil L. Chervu, Sara Sakowitz, Jessica A. Keeley.

**Investigation:** Konmal Ali, Nikhil L. Chervu, Sara Sakowitz, Jessica A. Keeley.

**Methodology:** Konmal Ali, Nikhil L. Chervu, Sara Sakowitz, Jessica A. Keeley.

**Project administration:** Konmal Ali, Nikhil L. Chervu, Jessica A. Keeley.

**Resources:** Konmal Ali.

**Supervision:** Nikhil L. Chervu, Peyman Benharash, Shahin Mohseni, Jessica A. Keeley.

**Validation:** Nikhil L. Chervu, Sara Sakowitz, Syed Shahyan Bakhtiyar, Peyman Benharash, Shahin Mohseni, Jessica A. Keeley.

**Visualization:** Konmal Ali, Nikhil L. Chervu, Peyman Benharash, Shahin Mohseni, Jessica A. Keeley.

**Writing – original draft:** Konmal Ali, Nikhil L. Chervu, Peyman Benharash, Shahin Mohseni, Jessica A. Keeley.

**Writing – review & editing:** Konmal Ali, Nikhil L. Chervu, Sara Sakowitz, Syed Shahyan Bakhtiyar, Peyman Benharash, Shahin Mohseni, Jessica A. Keeley.

## References

1. Gallaher JR, Charles A. Acute Cholecystitis: A Review. *JAMA*. 2022 Mar 8; 327(10):965–75. <https://doi.org/10.1001/jama.2022.2350> PMID: 35258527
2. Escartín A, González M, Cuello E, et al. Acute cholecystitis in very elderly patients: disease management, outcomes, and risk factors for complications. *Surg Res Pract*. 2019; 2019:9709242. <https://doi.org/10.1155/2019/9709242> PMID: 30854417
3. Parikh SS, Lindquester WS, Dhangana R. National cholecystostomy tube placement and cholecystectomy trends from 2010 to 2018. *Journal of the American College of Radiology*. 2023; 20(6):537–539. <https://doi.org/10.1016/j.jacr.2023.03.012> PMID: 37127221
4. Ambe PC, Kaptanis S, Papadakis M, Weber SA, Zirngibl H. Cholecystectomy vs. percutaneous cholecystostomy for the management of critically ill patients with acute cholecystitis: a protocol for a systematic review. *Syst Rev*. 2015 May 30; 4(1):77. <https://doi.org/10.1186/s13643-015-0065-8> PMID: 26025467
5. Kurihara H, Binda C, Cimino MM, Manta R, Manfredi G, Anderloni A. Acute cholecystitis: Which flow-chart for the most appropriate management? *Digestive and Liver Disease*. 2023; 55(9):1169–1177. <https://doi.org/10.1016/j.dld.2023.02.005> PMID: 36890051
6. Kim SJ, Park HS, Lee DW. Outcome of nonoperative treatment for hip fractures in elderly patients: A systematic review of recent literature. *J Orthop Surg (Hong Kong)*. 2020; 28(2):230949902093684. <https://doi.org/10.1177/2309499020936848> PMID: 32638635

7. Asmar S, Bible L, Obaid O, Anand T, Chehab M, Ditillo M, et al. Frail geriatric patients with acute calculous cholecystitis: Operative versus nonoperative management? *Journal of Trauma and Acute Care Surgery*. 2021 Jul; 91(1):219. <https://doi.org/10.1097/TA.00000000000003115> PMID: 33605704
8. Koelker M, Krimphove M, Alkhatib K, Nabi J, Kuo LE, Lipsitz SR, et al. Understanding Hospital-Level Patterns of Nonoperative Management for Low-risk Thyroid and Kidney Cancer. *JAMA Network Open*. 2022 Nov; 5(11):e2242210. <https://doi.org/10.1001/jamanetworkopen.2022.42210> PMID: 36378306
9. Liao CA, Wu YT, Liao CH, Wang SY, Fu CY, Hsieh CH, et al. Hospital level variations in the trends and outcomes of the nonoperative management of splenic injuries—a nationwide cohort study. *Scandinavian Journal of Trauma, Resuscitation and Emergency Medicine*. 2019 Jan 1; 27(1):4. <https://doi.org/10.1186/s13049-018-0578-y> PMID: 30635015
10. Roberson TA, Granade CM, Hunt Q, Griscom JT, Adams KJ, Momaya AM, et al. Nonoperative management versus reverse shoulder arthroplasty for treatment of 3- and 4-part proximal humeral fractures in older adults. *Journal of Shoulder and Elbow Surgery*. 2017 Jun 1; 26(6):1017–22. <https://doi.org/10.1016/j.jse.2016.10.013> PMID: 28139385
11. Wells K, Flesman J. Nonsurgical, minimally invasive, and surgical methods in management of acute diverticulitis. *JAMA Surgery*. 2019; 154(2):172–173. <https://doi.org/10.1001/jamasurg.2018.3112> PMID: 30476969
12. Seib CD, Meng T, Suh I, Harris AHS, Covinsky KE, Shoback DM, et al. Risk of Fracture Among Older Adults With Primary Hyperparathyroidism Receiving Parathyroidectomy vs Nonoperative Management. *JAMA Internal Medicine*. 2022 Jan 1; 182(1):10–8. <https://doi.org/10.1001/jamainternmed.2021.6437> PMID: 34842909
13. Janssen ERI, Hendriks T, Natroshvili T, Bremers AJA. Retrospective Analysis of Non-Surgical Treatment of Acute Cholecystitis. *Surgical Infections*. 2020 Jun; 21(5):428–32. <https://doi.org/10.1089/sur.2019.261> PMID: 31880501
14. Healthcare Cost and Utilization Project (HCUP). 2022. HCUP-US NRD Overview.
15. van Walraven C, Austin PC, Jennings A, Quan H, Forster AJ. A Modification of the Elixhauser Comorbidity Measures into a Point System for Hospital Death Using Administrative Data. *Medical Care*. 2009; 47(6):626–33. <https://doi.org/10.1097/MLR.0b013e31819432e5> PMID: 19433995
16. Using appropriate price indices for expenditure comparisons. Accessed February 15, 2024. [https://meps.ahrq.gov/about\\_meps/Price\\_Index.shtml](https://meps.ahrq.gov/about_meps/Price_Index.shtml)
17. Viglianti EM, Bagshaw SM, Bellomo R, McPeake J, Wang XQ, Seelye S, et al. Hospital-level variation in the development of persistent critical illness. *Intensive Care Med*. 2020 Aug 1; 46(8):1567–75. <https://doi.org/10.1007/s00134-020-06129-9> PMID: 32500182
18. Tibshirani R. Regression Shrinkage and Selection Via the Lasso. *Journal of the Royal Statistical Society: Series B (Methodological)*. 1996; 58(1):267–88.
19. Tilford JM, Roberson PK, Fiser DH. Using Ifit and Iroc to evaluate mortality prediction models. *Stata Technical Bulletin*. 1996; 5(28). <https://ideas.repec.org/a/tsj/stbuly/1996v5i28sbe12.html>.
20. Verma A, Bakhtiyar SS, Chervu N, Hadaya J, Kronen E, Sanaiha Y, et al. Center-Level Variation in Failure to Rescue After Elective Adult Cardiac Surgery. *The Annals of Thoracic Surgery*. 2023 Apr 7. <https://doi.org/10.1016/j.athoracsur.2023.03.034> PMID: 37031769
21. Parina RP, Chang DC, Rose JA, Talamini MA. Is a Low Readmission Rate Indicative of a Good Hospital? *Journal of the American College of Surgeons*. 2015 Feb 1; 220(2):169–76. <https://doi.org/10.1016/j.jamcollsurg.2014.10.020> PMID: 25529903
22. Adam MA, Turner MC, Sun Z, Kim J, Ezekian B, Migaly J, et al. The appropriateness of 30-day mortality as a quality metric in colorectal cancer surgery. *The American Journal of Surgery*. 2018 Jan 1; 215(1):66–70. <https://doi.org/10.1016/j.amjsurg.2017.04.018> PMID: 28599835
23. Fagenson AM, Powers BD, Zorbas KA, Karhadkar S, Karachristos A, Di Carlo A, et al. Frailty Predicts Morbidity and Mortality After Laparoscopic Cholecystectomy for Acute Cholecystitis: An ACS-NSQIP Cohort Analysis. *J Gastrointest Surg*. 2021; 25(4):932–40. <https://doi.org/10.1007/s11605-020-04570-1> PMID: 32212087
24. Pontarelli EM, Grinberg GG, Isaacs RS, Morris JP, Ajayi O, Yenumula PR. Regional cost analysis for laparoscopic cholecystectomy. *Surg Endosc*. 2019 Jul 1; 33(7):2339–44. <https://doi.org/10.1007/s00464-018-6526-0> PMID: 30488194
25. Mora-Guzmán I, Di Martino M, Bonito A, Jodra V, Hernández S, Martín-Pérez E. Conservative management of gallstone disease in the elderly population: outcomes and recurrence. *Scand J Surg*. 2020; 109(3):205–210. <https://doi.org/10.1177/1457496919832147> PMID: 30791835
26. Saber A, Hokkam EN. Operative Outcome and Patient Satisfaction in Early and Delayed Laparoscopic Cholecystectomy for Acute Cholecystitis. *Minimally Invasive Surgery*. 2014 Aug 14; 2014:e162643. <https://doi.org/10.1155/2014/162643> PMID: 25197568

27. Watson M, Baimas-George M, Hanna Baker E, Bennett Martinie J, Vrochides DV, Anthony Iannitti D, et al. Failure to Operate on Early Stage Pancreatic Cancer in the Era of Modern Chemotherapy: An Analysis of the National Cancer Database. *Journal of the American College of Surgeons*. 2020 Oct 1; 231(4, Supplement 2):e158.
28. Haque LA. The effect of delays in acute medical treatment on total cost and potential ramifications due to the coronavirus pandemic. *HPR*. 2021; 26. Accessed February 15, 2024. <https://www.jstor.org/stable/48617322>
29. Testa EJ, Modest JM, Brodeur P, Lemme NJ, Gil JA, Cruz AI. Do Patient Demographic and Socioeconomic Factors Influence Surgical Treatment Rates After ACL Injury? *J Racial and Ethnic Health Disparities*. 2023 Feb 1; 10(1):319–24. <https://doi.org/10.1007/s40615-021-01222-1> PMID: 35006586
30. Sceats LA, Trickey AW, Morris AM, Kin C, Staudenmayer KL. Nonoperative Management of Uncomplicated Appendicitis Among Privately Insured Patients. *JAMA Surg*. 2019 Feb; 154(2):141–9. <https://doi.org/10.1001/jamasurg.2018.4282> PMID: 30427983
31. McCutcheon BA, Chang DC, Marcus LP, Inui T, Noorbakhsh A, Schallhorn C, et al. Long-Term Outcomes of Patients with Nonsurgically Managed Uncomplicated Appendicitis. *Journal of the American College of Surgeons*. 2014 May; 218(5):905–13. <https://doi.org/10.1016/j.jamcollsurg.2014.01.003> PMID: 24661850
32. Loehrer AP, Song Z, Auchincloss HG, Hutter MM. Influence of Health Insurance Expansion on Disparities in the Treatment of Acute Cholecystitis. *Ann Surg*. 2015 Jul; 262(1):139–45. <https://doi.org/10.1097/SLA.0000000000000970> PMID: 25775059
33. Popescu I, Fingar KR, Cutler E, Guo J, Jiang HJ. Comparison of 3 safety-net hospital definitions and association with hospital characteristics. *JAMA Network Open*. 2019; 2(8):e198577. <https://doi.org/10.1001/jamanetworkopen.2019.8577> PMID: 31390034
34. Hefner JL, Hogan TH, Opoku-Agyeman W, Menachemi N. Defining safety net hospitals in the health services research literature: a systematic review and critical appraisal. *BMC Health Services Research*. 2021; 21(1):278. <https://doi.org/10.1186/s12913-021-06292-9> PMID: 33766014
35. Hashmi ZG, Jarman MP, Havens JM, Scott JW, Goralnick E, Cooper Z, et al. Quantifying lives lost due to variability in emergency general surgery outcomes: Why we need a national emergency general surgery quality improvement program. *Journal of Trauma and Acute Care Surgery*. 2021 Apr; 90(4):685. <https://doi.org/10.1097/TA.0000000000003074> PMID: 33443987
36. Scott JW, Havens JM, Wolf LL, Zogg CK, Rose JA, Salim A, et al. Insurance status is associated with complex presentation among emergency general surgery patients. *Surgery*. 2017 Feb 1; 161(2):320–8. <https://doi.org/10.1016/j.surg.2016.08.038> PMID: 27712875
37. Chua KP, Sommers BD. Changes in Health and Medical Spending Among Young Adults Under Health Reform. *JAMA*. 2014 Jun 18; 311(23):2437–9. <https://doi.org/10.1001/jama.2014.2202> PMID: 24938568
38. Nath JB, Costigan S, Lin F, Vittinghoff E, Hsia RY. Access to federally qualified health centers and emergency department use among uninsured and medicaid-insured adults: california, 2005 to 2013. Mycyk MB, ed. *Academic Emergency Medicine*. 2019; 26(2):129–139. <https://doi.org/10.1111/acem.13494> PMID: 30648780
